# Supplementary material
Source: PubMed Central journal article supplement (PMC3584862)
Supplement: IAI.01305-12_zii999090044so1.pdf [file IAI.01305-12_zii999090044so1.pdf]

**Table S1. Oligonucleotides used in this study**

| Oligo Name | Sequence (5' to 3')                                       | 5' Modification | 3' Modification | Application           |
|------------|-----------------------------------------------------------|-----------------|-----------------|-----------------------|
| JHC389     | GGGGGGGGGAAAAACGGCCGATTGTGATATAAATTAATAATTCATATTCTGTTGCC  | NONE            | NONE            | pL2 amplification     |
| JHC390     | GGGGGGGGGAAAAAGTCGACATTGGGGGTGTTTGTACTAGAGGACTTACCTCTCCCA | NONE            | NONE            | pL2 amplification     |
| JHC235     | AATAGACCGCCTCTAGCGCTGCG                                   | NONE            | NONE            | pBRCT correction      |
| JHC398     | CCGCATCCAACCAATTGTAATAGAAGC                               | NONE            | NONE            | pBRCT correction      |
| JHC399     | AATGAGTACAATGAAAAATCCATTGCG                               | NONE            | NONE            | pBRCT correction      |
| JHC400     | GAACAAGAATCTATTAATTAATAGC                                 | NONE            | NONE            | pBRCT correction      |
| pgp1A      | TACCATGGTGGGAAAAATAGACATGGATCG                            | NONE            | NONE            | <i>pgp1</i> knockout  |
| pgp1B      | TACCATGGCCATATCTTTGATACGACGCCG                            | NONE            | NONE            | <i>pgp1</i> knockout  |
| pgp2A      | TACCATGGATAACTAAGAAATCTAAAGAACAAATG                       | NONE            | NONE            | <i>pgp2</i> knockout  |
| pgp2B      | TACCATGGCCATTTTGAGCCAATTTGGGA                             | NONE            | NONE            | <i>pgp2</i> knockout  |
| pgp3A      | TACCATGGAATAACAAATACTTCTAATGTATCTTTTTTG                   | NONE            | NONE            | <i>pgp3</i> knockout  |
| pgp3B      | TACCATGGTTTAAACTCTTTTTTATTTTGAGCTTAA                      | NONE            | NONE            | <i>pgp3</i> knockout  |
| pgp4A      | TACCATGGCTAATTCTAGGACTGCTTCAAC                            | NONE            | NONE            | <i>pgp4</i> knockout  |
| pgp4B      | TACCATGGAACAAACCCGTAATTCGAAC                              | NONE            | NONE            | <i>pgp4</i> knockout  |
| pgp5A      | TACCATGGTCTGTAGCTAATGTCTATCCAAA                           | NONE            | NONE            | <i>pgp5</i> knockout  |
| pgp5B      | TACCATGGGTTTAGAGAAAAGTGTGTTTTTCC                          | NONE            | NONE            | <i>pgp5</i> knockout  |
| pgp6A      | TACCATGGTGAACTTTTAAGCAAAGAGCTGA                           | NONE            | NONE            | <i>pgp6</i> knockout  |
| pgp6B      | TACCATGGGCTGAGAATAGTTCAATGGAAGG                           | NONE            | NONE            | <i>pgp6</i> knockout  |
| pgp7A      | TACCATGGTTCATTTAAAGCAAATAGGATTAAG                         | NONE            | NONE            | <i>pgp7</i> knockout  |
| pgp7B      | TACCATGGTTTCTTAACCAAAGCTATTCAAAATC                        | NONE            | NONE            | <i>pgp7</i> knockout  |
| pgp8A      | TACCATGGAAAACCTCCTGATAAGACTTTTCG                          | NONE            | NONE            | <i>pgp8</i> knockout  |
| pgp8B      | TACCATGGAGCTAAAAAAAATCAATGCCCG                            | NONE            | NONE            | <i>pgp8</i> knockout  |
| pgp1F      | ATGAAAACCTCGTTCCGAAATAGAAA                                | NONE            | NONE            | <i>pgp1</i> detection |
| pgp1R      | TTACCATACTTTTTTAATAGCGGAGAA                               | NONE            | NONE            | <i>pgp1</i> detection |
| pgp2F      | ATGGTAAATTATAGTAACTGCCACTTCAT                             | NONE            | NONE            | <i>pgp2</i> detection |
| pgp2R      | TTAATTAATAGATTCTGTTCTAATTGTTC                             | NONE            | NONE            | <i>pgp2</i> detection |
| pgp3F      | ATGGGAAATTCTGGTTTTTATTGTAT                                | NONE            | NONE            | <i>pgp3</i> detection |
| pgp3R      | TTAAGCGTTTGTGAGGTATTACCT                                  | NONE            | NONE            | <i>pgp3</i> detection |
| pgp4F      | ATGCAAATAAAAGCAAAGTGAGGG                                  | NONE            | NONE            | <i>pgp4</i> detection |
| pgp4R      | CTATTCAGCCTTGGAAAACATGTCT                                 | NONE            | NONE            | <i>pgp4</i> detection |
| pgp5F      | GTGGGATGCAACTTGCCCA                                       | NONE            | NONE            | <i>pgp5</i> detection |
| pgp5R      | TCACGTTGCTCTGAGAGTAATCTCG                                 | NONE            | NONE            | <i>pgp5</i> detection |
| pgp6F      | GTGAACAAACTAAAAAAGAAGCGAAT                                | NONE            | NONE            | <i>pgp6</i> detection |
| pgp6R      | TCAGCTCTTTGCTTAAAAAGTCA                                   | NONE            | NONE            | <i>pgp6</i> detection |
| pgp7F      | ATGGGCTCGATGGCTTTCCAT                                     | NONE            | NONE            | <i>pgp7</i> detection |
| pgp7R      | TCAAAGCGCTTGACGAAGTACT                                    | NONE            | NONE            | <i>pgp7</i> detection |
| pgp8F      | ATGGGTAAGGGATTTTATCTTTGC                                  | NONE            | NONE            | <i>pgp8</i> detection |
| pgp8R      | CTATATTAGAGCCATCTTCTTTGAAGC                               | NONE            | NONE            | <i>pgp8</i> detection |
| CTL71F     | ACCACTAATGTGAAAAGCTGATTC                                  | NONE            | NONE            | CTL0071 qPCR          |

**Table S1. Oligonucleotides used in this study-Continued**

| Oligo Name | Sequence (5' to 3')            | 5' Modification | 3' Modification | Application      |
|------------|--------------------------------|-----------------|-----------------|------------------|
| CTL71R     | CGGTCATGCAAATGATGATATTG        | NONE            | NONE            | CTL0071 qPCR     |
| CTL71p     | AAGACTTCCCAGCCCAAATGCCAACTT    | FAM             | BHQ1            | CTL0071 qPCR     |
| CTL305F    | GATGCTACAGCCCAACTGATC          | NONE            | NONE            | CTL0305 qPCR     |
| CTL305R    | TGCACTCCCAACTACAGTTTTC         | NONE            | NONE            | CTL0305 qPCR     |
| CTL305p    | AGAGCCTTACCAGCATTTCCTGGT       | FAM             | BHQ1            | CTL0305 qPCR     |
| CTL339F    | TTGGTCTGAGAATGGCTTCCTT         | NONE            | NONE            | CTL0339 qPCR     |
| CTL339R    | GGGAGTAATACAAAGCACACTCTCTTAC   | NONE            | NONE            | CTL0339 qPCR     |
| CTL339p    | TCCCATATCGCTTGATTTTGCTTTGCTGT  | FAM             | BHQ1            | CTL0339 qPCR     |
| CTL397F    | CCTGACGGACCTTTTCTCTTCTC        | NONE            | NONE            | CTL0397 qPCR     |
| CTL397R    | ATATAAAGTGGACAAGGCGGACTT       | NONE            | NONE            | CTL0397 qPCR     |
| CTL397p    | CATAGTCTCCGCCCTTGTAACGCACCTCTA | FAM             | BHQ1            | CTL0397 qPCR     |
| CTL398F    | CATTGCGCATCCATAAGTTTTG         | NONE            | NONE            | CTL0398 qPCR     |
| CTL398R    | GGAGGATAACATGAAGAAACCAGTATTT   | NONE            | NONE            | CTL0398 qPCR     |
| CTL398p    | CCCCGTTCCCTTCTGTACTTATCCCAGG   | FAM             | BHQ1            | CTL0398 qPCR     |
| CTL399F    | TAAGAATGGAGAGCCTAAAATAAGTATGC  | NONE            | NONE            | CTL0399 qPCR     |
| CTL399R    | CCAGCCTCTAGTATCTCCAGATCCT      | NONE            | NONE            | CTL0399 qPCR     |
| CTL399p    | CAGCGCTATCCGGAGGCCACG          | FAM             | BHQ1            | CTL0399 qPCR     |
| CTL638F    | GCGTTATGTGTTAACTTGATGTTTGCT    | NONE            | NONE            | CTL0638 qPCR     |
| CTL638R    | TCTATCAGCGTCGTAAGAAAAGCTT      | NONE            | NONE            | CTL0638 qPCR     |
| CTL638p    | CGCCTCATCAGCATATTCAGCTTTCCTTT  | FAM             | BHQ1            | CTL0638 qPCR     |
| pgp3qF     | AACTCAAAACTGCGTCTTTGC          | NONE            | NONE            | <i>pgp3</i> qPCR |
| pgp3qR     | TGCGACAGGTGTGATGTTGT           | NONE            | NONE            | <i>pgp3</i> qPCR |
| pgp3qp     | ACAGAGCCGCTCAAGGACCAGCAAATA    | FAM             | BHQ1            | <i>pgp3</i> qPCR |
| glgAF      | AAATATTTATTGGCGGCAGTTTCT       | NONE            | NONE            | <i>glgA</i> qPCR |
| glgAR      | TTTCGGAAGCAGTGACAACCT          | NONE            | NONE            | <i>glgA</i> qPCR |
| glgAp      | CCGTACCAACCACGACAAGTGGCAA      | FAM             | BHQ1            | <i>glgA</i> qPCR |
| lpdAF      | CAGAAAATATTGGCTTGGATAAAGCT     | NONE            | NONE            | <i>lpdA</i> qPCR |
| lpdAR      | TAGGTACGTTTGTGCGCATTGT         | NONE            | NONE            | <i>lpdA</i> qPCR |
| lpdAp      | TGAACGCGGAGTCATCCCTACCGAT      | CalFluorGold540 | BHQ1            | <i>lpdA</i> qPCR |
